# Supplementary material for: Optically controllable polarized luminescence from azopolymer films doped with a lanthanide complex
Source: Royal Society of Chemistry journal article supplement (doi:10.1039/b802198h), 2008-01-01
Supplement: b802198h.pdf [file b802198h.pdf]

## Optically controllable polarized luminescence from azopolymer film doped with lanthanide complex

Si Wu<sup>a</sup>, Xiaowu Yu<sup>a</sup>, Jintang Huang<sup>b</sup>, Jing Shen<sup>a</sup>, Qing Yan<sup>a</sup>, Xin Wang<sup>a</sup>, Wenxuan Wu<sup>a</sup>, Yanhua Luo<sup>a</sup>, Keyi Wang<sup>b</sup> and Qijin Zhang<sup>a\*</sup>

<sup>a</sup>Department of Polymer Science and Engineering, Joint Laboratory of Polymer Thin Films and Solution, Key laboratory of optoelectronic science and technology, Anhui Province, University of Science and Technology of China, Hefei, Anhui 230026, P. R. China

<sup>b</sup>Department of Precision Machinery and Precision Instrumentation, University of Science and Technology of China, Hefei, Anhui 230026, P. R. China

### Electronic Supplementary Information (ESI)

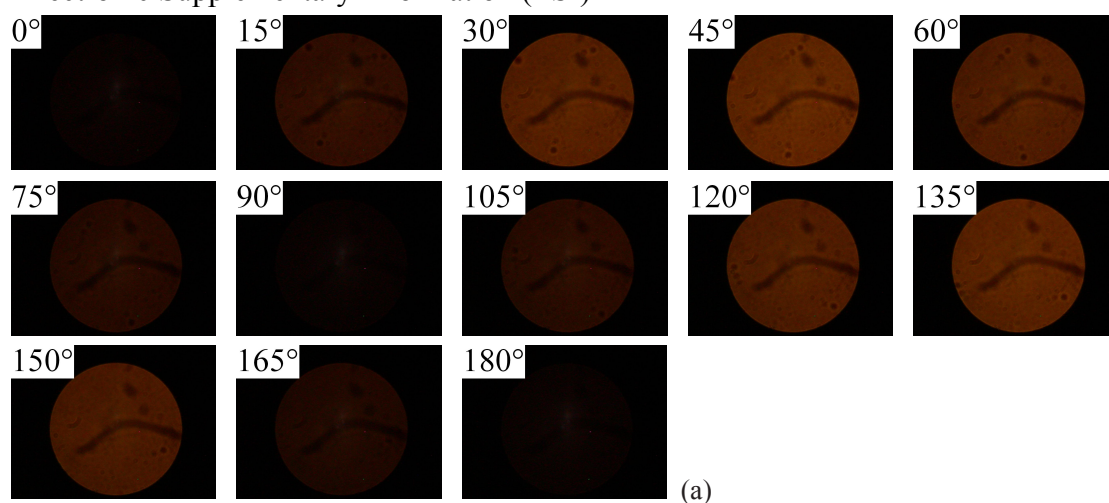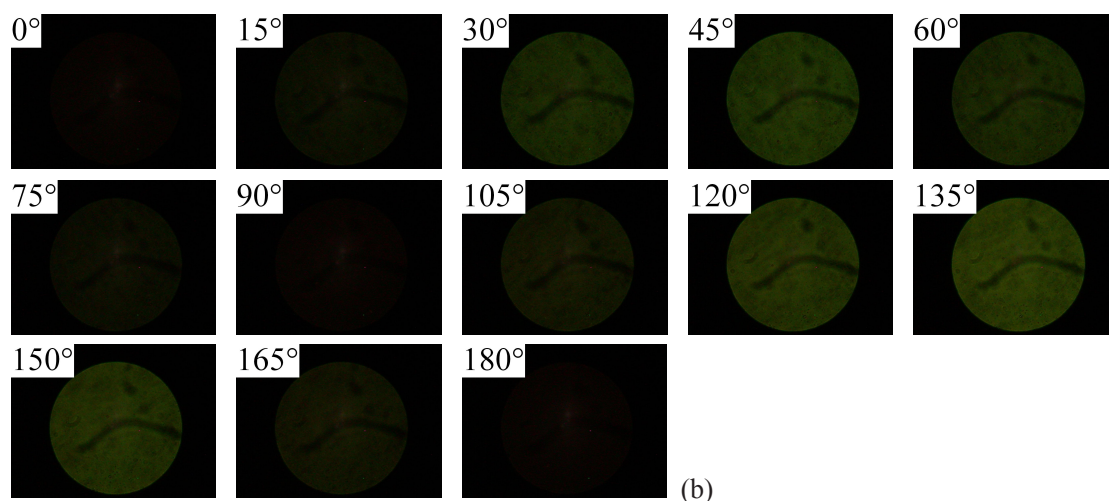

Figure S1 The POM images of (a) DACENO<sub>2</sub>/Eu(TTA)<sub>3</sub>Phen film and (b) DACEOCH<sub>3</sub>/Eu(TTA)<sub>3</sub>Phen film after photo-induced orientation with different angles to the polarizer. The black bands and dots in the bright field are something on the ocular but not something on the samples.

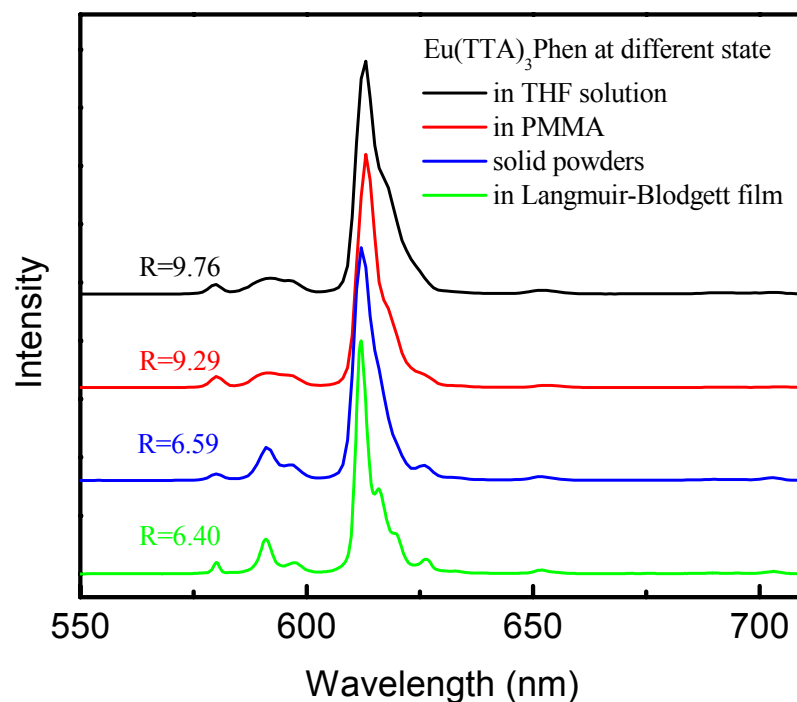

Figure S2 Fluorescence spectra of Eu(TTA)<sub>3</sub>Phen in THF solution, Eu(TTA)<sub>3</sub>Phen doped PMMA film (Eu(TTA)<sub>3</sub>Phen concentration is 3 wt %), Eu(TTA)<sub>3</sub>Phen powders and Eu(TTA)<sub>3</sub>Phen in Langmuir-Blodgett film. The data of Eu(TTA)<sub>3</sub>Phen doped PMMA and Eu(TTA)<sub>3</sub>Phen in Langmuir-Blodgett film are taken from our previous work.<sup>1,2</sup>

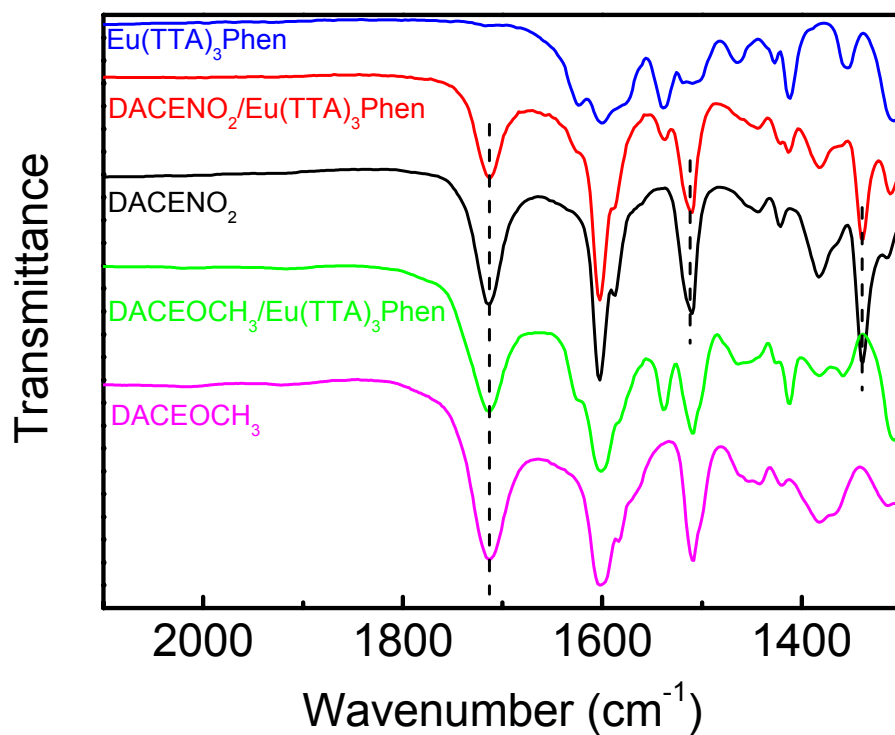

Figure S3 FT-IR spectra of Eu(TTA)<sub>3</sub>Phen, DACENO<sub>2</sub>/Eu(TTA)<sub>3</sub>Phen, DACENO<sub>2</sub>, DACEOCH<sub>3</sub>/Eu(TTA)<sub>3</sub>Phen and DACEOCH<sub>3</sub>. The peaks of carbonyl groups and nitril groups did not change. This means there is no coordination interaction between the polymer matrices and Eu<sup>3+</sup>.

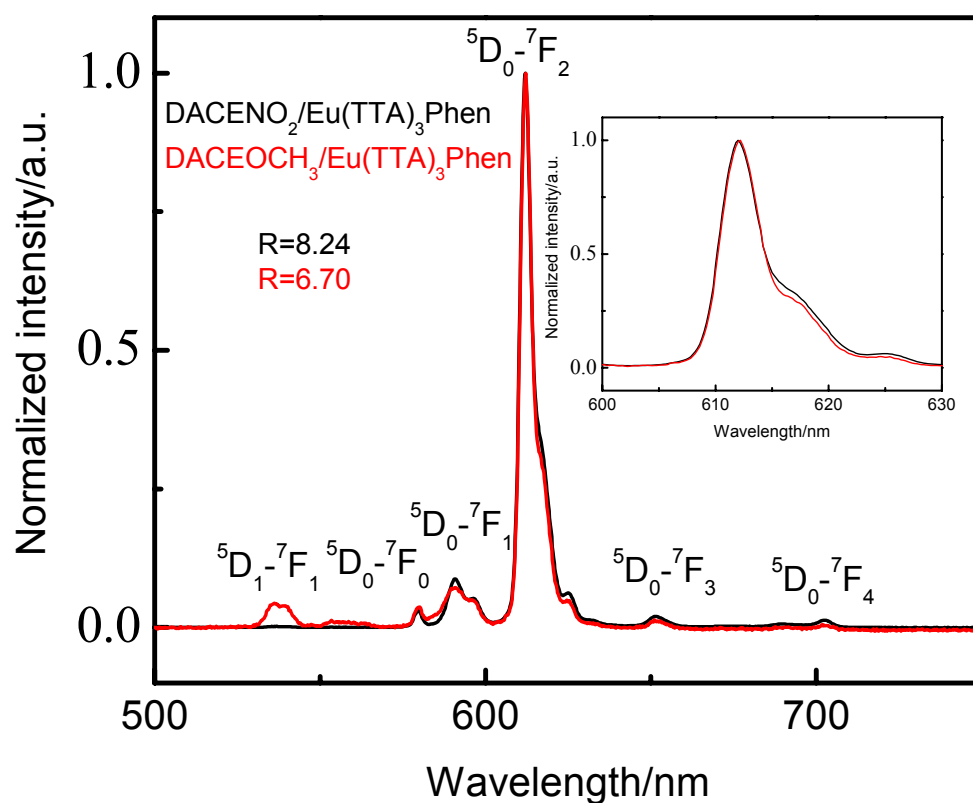

Figure S4 Intensity-normalized fluorescence spectra of DACENO<sub>2</sub>/Eu(TTA)<sub>3</sub>Phen film and DACEOCH<sub>3</sub>/Eu(TTA)<sub>3</sub>Phen film. The inset is the enlargement of <sup>5</sup>D<sub>0</sub>→<sup>7</sup>F<sub>2</sub> transition. It can be clearly seen that there is some differences in <sup>5</sup>D<sub>0</sub>→<sup>7</sup>F<sub>1</sub> and <sup>5</sup>D<sub>0</sub>→<sup>7</sup>F<sub>2</sub> transition of Eu(TTA)<sub>3</sub>Phen in the two films. Besides the differences in <sup>5</sup>D<sub>1</sub>-<sup>7</sup>F<sub>1</sub> transitions and <sup>5</sup>D<sub>0</sub>-<sup>7</sup>F<sub>2</sub>/<sup>5</sup>D<sub>0</sub>-<sup>7</sup>F<sub>1</sub> relative intensity ratio, this is the third proof that the local environment of Eu<sup>3+</sup> in the two films is different.

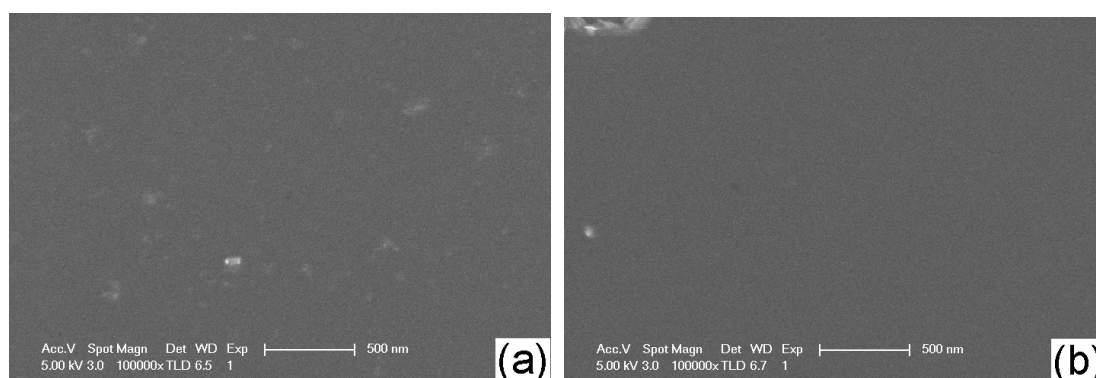

Figure S5 SEM images of (a) DACENO<sub>2</sub>/Eu(TTA)<sub>3</sub>Phen film and (b) DACEOCH<sub>3</sub>/Eu(TTA)<sub>3</sub>Phen film.



Table S1 shows the theory calculation on the radiation parameters of the two films. Judd-Ofelt theory is employed to calculate these parameters.<sup>3,4</sup> The detailed calculation process is reported in our previous work.<sup>1,5</sup>

Table S1

(a) Radiative parameters of DACENO<sub>2</sub>/Eu(TTA)<sub>3</sub>Phen film

R=8.24      Ω<sub>2</sub>=12.44×10<sup>-20</sup> cm<sup>2</sup>      Ω<sub>4</sub>=0.38×10<sup>-20</sup> cm<sup>2</sup>

| Emission transition                                       | $\nu$ (cm <sup>-1</sup> ) | $A_{ed}$ (s <sup>-1</sup> ) | $A_{md}$ (s <sup>-1</sup> ) | $A$ (s <sup>-1</sup> ) | $\beta$ (%) | $\sigma$ (10 <sup>-22</sup> cm <sup>2</sup> ) |
|-----------------------------------------------------------|---------------------------|-----------------------------|-----------------------------|------------------------|-------------|-----------------------------------------------|
| <sup>5</sup> D <sub>0</sub> → <sup>7</sup> F <sub>0</sub> | 17247                     | 0                           | 0                           | 0                      | 0           | 0                                             |
| <sup>5</sup> D <sub>0</sub> → <sup>7</sup> F <sub>1</sub> | 16932                     | 0                           | 75.93                       | 75.93                  | 10.68       | 4.55                                          |
| <sup>5</sup> D <sub>0</sub> → <sup>7</sup> F <sub>2</sub> | 16340                     | 625.62                      | 0                           | 625.62                 | 88.04       | 59.48                                         |
| <sup>5</sup> D <sub>0</sub> → <sup>7</sup> F <sub>3</sub> | 15352                     | 0                           | 0                           | 0                      | 0           | 0                                             |
| <sup>5</sup> D <sub>0</sub> → <sup>7</sup> F <sub>4</sub> | 14237                     | 9.09                        | 0                           | 9.09                   | 1.28        | 1.43                                          |
| $A_T$ (s <sup>-1</sup> )                                  |                           |                             |                             | 710.64                 |             |                                               |
| Radiative lifetime $\tau_{rad}$ (ms)= 1.41 ms             |                           |                             |                             |                        |             |                                               |

(b) Radiative parameters of DACEOCH<sub>3</sub>/Eu(TTA)<sub>3</sub>Phen film

R=6.70      Ω<sub>2</sub>=10.10×10<sup>-20</sup> cm<sup>2</sup>      Ω<sub>4</sub>=0.35×10<sup>-20</sup> cm<sup>2</sup>

| Emission transition                                       | $\nu$ (cm <sup>-1</sup> ) | $A_{ed}$ (s <sup>-1</sup> ) | $A_{md}$ (s <sup>-1</sup> ) | $A$ (s <sup>-1</sup> ) | $\beta$ (%) | $\sigma$ (10 <sup>-22</sup> cm <sup>2</sup> ) |
|-----------------------------------------------------------|---------------------------|-----------------------------|-----------------------------|------------------------|-------------|-----------------------------------------------|
| <sup>5</sup> D <sub>0</sub> → <sup>7</sup> F <sub>0</sub> | 17235                     | 0                           | 0                           | 0                      | 0           | 0                                             |
| <sup>5</sup> D <sub>0</sub> → <sup>7</sup> F <sub>1</sub> | 16920                     | 0                           | 75.77                       | 75.77                  | 12.80       | 3.39                                          |
| <sup>5</sup> D <sub>0</sub> → <sup>7</sup> F <sub>2</sub> | 16335                     | 507.48                      | 0                           | 507.48                 | 85.78       | 50.07                                         |
| <sup>5</sup> D <sub>0</sub> → <sup>7</sup> F <sub>3</sub> | 15361                     | 0                           | 0                           | 0                      | 0           | 0                                             |
| <sup>5</sup> D <sub>0</sub> → <sup>7</sup> F <sub>4</sub> | 14241                     | 8.38                        | 0                           | 8.38                   | 1.42        | 0.98                                          |
| $A_T$ (s <sup>-1</sup> )                                  |                           |                             |                             | 591.63                 |             |                                               |
| Radiative lifetime $\tau_{rad}$ (ms)=1.69 ms              |                           |                             |                             |                        |             |                                               |

The Judd-Ofelt parameters Ω<sub>2</sub>, Ω<sub>4</sub> are presented in Table S1. Ω<sub>6</sub> is not presented because the <sup>5</sup>D<sub>0</sub>→<sup>7</sup>F<sub>6</sub> transition could not be experimentally detected. This indicates Ω<sub>6</sub> is not important here. The large values of Ω<sub>2</sub> indicate the presence of covalent bonding between the Eu<sup>3+</sup> and the surrounding ligands.<sup>6</sup> The strong hypersensitive transition <sup>5</sup>D<sub>0</sub>→<sup>7</sup>F<sub>2</sub> accounts for such Ω<sub>2</sub> values. The Ω<sub>4</sub> parameters have been related together to bulk properties of the lanthanide-based hosts, but there is no theoretical prediction for this sensibility to macroscopic properties.<sup>7</sup> The quality of the host material for lasing action of Eu<sup>3+</sup> is often expressed through R or Ω<sub>2</sub> values.<sup>8</sup> According to the calculation equations<sup>1,5</sup>, there is a relationship between Ω<sub>2</sub> and stimulated emission cross section. The Ω<sub>2</sub> of DACENO<sub>2</sub>/Eu(TTA)<sub>3</sub>Phen is bigger than that of DACEOCH<sub>3</sub>/Eu(TTA)<sub>3</sub>Phen. The stimulated emission cross section of DACENO<sub>2</sub>/Eu(TTA)<sub>3</sub>Phen is also bigger than that of DACEOCH<sub>3</sub>/Eu(TTA)<sub>3</sub>Phen. The <sup>5</sup>D<sub>0</sub>→<sup>7</sup>F<sub>2</sub> transition shows the highest fluorescence branching ratio value in both films. It has already been established that an emission level with fluorescence branching ratio value near 50% becomes a potential laser emission transition.<sup>9</sup> And our results are

88.04% for DACENO<sub>2</sub>/Eu(TTA)<sub>3</sub>Phen and 85.78% for DACEOCH<sub>3</sub>/Eu(TTA)<sub>3</sub>Phen, which are much higher than 50%. In addition, the stimulated emission cross section of <sup>5</sup>D<sub>0</sub>→<sup>7</sup>F<sub>2</sub> of the two films are 59.48×10<sup>-22</sup> cm<sup>2</sup> and 50.07×10<sup>-22</sup> cm<sup>2</sup> which are higher than Europium complex doped PMMA, in which optical amplification effect is observed.<sup>10</sup> All these results showed that the films have highly fluorescent efficiency and the <sup>5</sup>D<sub>0</sub>→<sup>7</sup>F<sub>2</sub> transition can be considered as a possible laser transition and can be used in optical amplification. DACENO<sub>2</sub> is better than DACEOCH<sub>3</sub> because the Judd-Ofelt parameters listed in Table S1 indicated DACENO<sub>2</sub>/Eu(TTA)<sub>3</sub>Phen has better radiation properties and Eu(TTA)<sub>3</sub>Phen emits stronger red light in DACENO<sub>2</sub>.

## References

- 1 J. Guan, B. Chen, Y. Sun, H. Liang and Q. Zhang, *J. Non-Cryst. Solids*, 2005, **351**, 849.
- 2 S. Wu, P. He, J. Guan, B. Chen, Y. Luo, Q. Yan and Q. Zhang, *J. Photochem. Photobiol. A: Chem.*, 2007, **188**, 218.
- 3 G. S. Ofelt, *J. Chem. Phys.*, 1962, **37**, 511.
- 4 B. R. Judd, *Phys. Rev.*, 1962, **127**, 750.
- 5 H. Liang, Z. Zheng, Q. Zhang, H. Ming, B. Chen, J. Xu, H. Zhao, *J. Mater. Res.*, 2003, **18**, 1895.
- 6 C. Koeppen, S. Yamada, G. Jiang, A. F. Garito, L. R. Dalton, *J. Opt. Soc. Am. B*, 1997, **14**, 156.
- 7 S.S. Braga, R.A. Saferreira, I.S. Goncalves, M. Pillinger, J. Rocha, J.J.C. Teixeira-Dias, L.D. Carlos, *J. Phys. Chem. B*, 2002, **106**, 11430.
- 8 A. Kumar, D. K. Rai, S. B. Rai, *Spectrosc. Acta A*, 2002, **58**, 2115.
- 9 V. Ravikumar, N. Veeraiah, B. Apparao, S. Bhuddudu, *J. Mater. Sci.* 33 (1998) 2659.
- 10 H. Liang, Z. Zheng, Q. Zhang, H. Ming, Z. Li, J. Xu, B. Chen, H. Zhao, *Optics Letters* 29 (2004) 477.
